# Supplementary material
Source: publisher site journal article supplement (https://www.dovepress.com/article/305865)
Supplement: Supplementary file 1 [file get_supplementary_file.php]

## **Supplementary materials**

### **Figure S1 TUSC7 overexpression in TNBC decreases chemoresistance of breast cancer cells**

Dose-response analyses of carboplatin (A) or paclitaxel (B) effect in breast cancer cells with TUSC7 overexpression. MDA-MB-468 transfected with empty vector or TUSC7 overexpression vector were plated in 96-well plates and treated with the indicated doses of carboplatin or paclitaxel for 72 h. The viable cell number was expressed as a percentage of corresponding vehicle controls.

### **Figure S2 The correlation between the expression level of TUSC7 and miR-1244-3P**

- A. The expression level of TUSC7 was positively correlated with the expression level of miR-1244-3P ( $R=0.86$ ,  $P<0.001$ ).
- B. Compared with the peritumor normal tissue, the expression level of miR-1244-3P was significantly lower in the tumor tissue ( $P<0.001$ ).

### **Figure S3 The binding sites with miR-1224-3P in TUSC7.**

### **Figure S4 The potentially involved signaling pathway of TUSC7**

Gene expression arrays of TUSC7 shRNA downregulated MDA-MB-231 breast cancer cells and scrambled sequences control. (a) Biological pathways in TUSC7 knockdown MDA-MB-231 breast cancer cells using Pathway Studio software. (b) Genes involved in the affected pathways in TUSC7 knockdown MDA-MB-231 breast cancer cells were validated by RT-PCR.



Figure S1

A

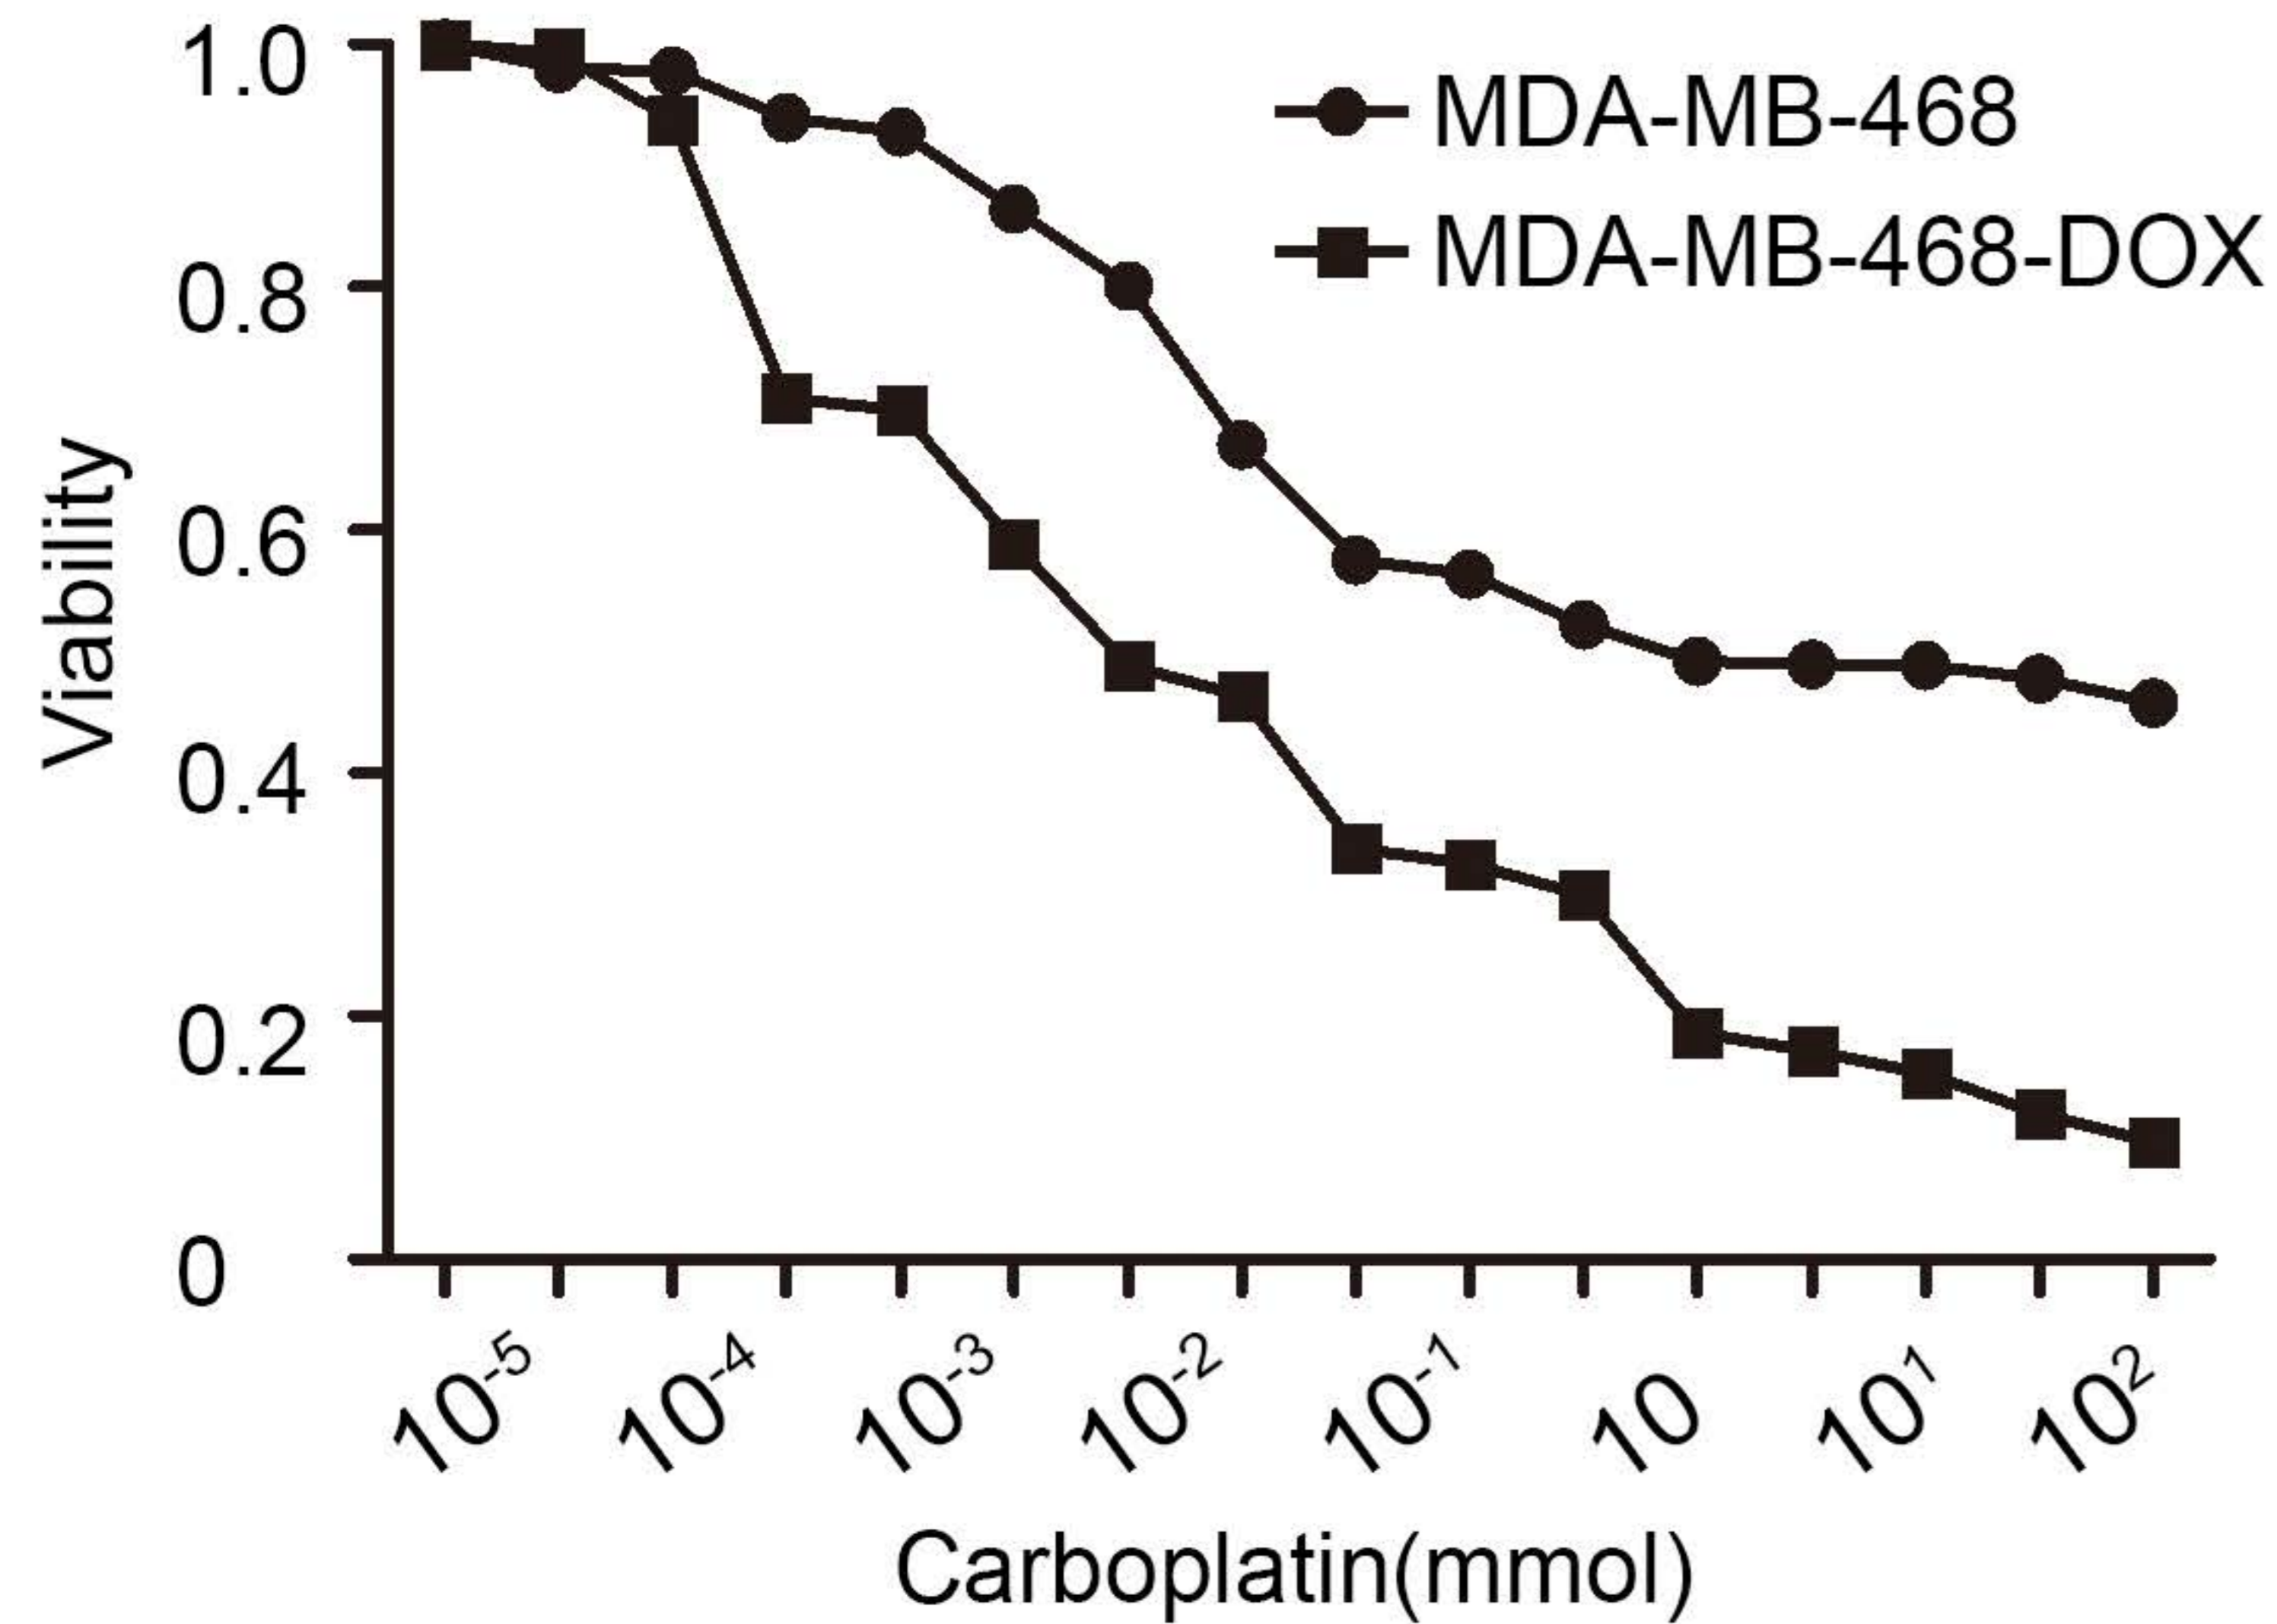

B

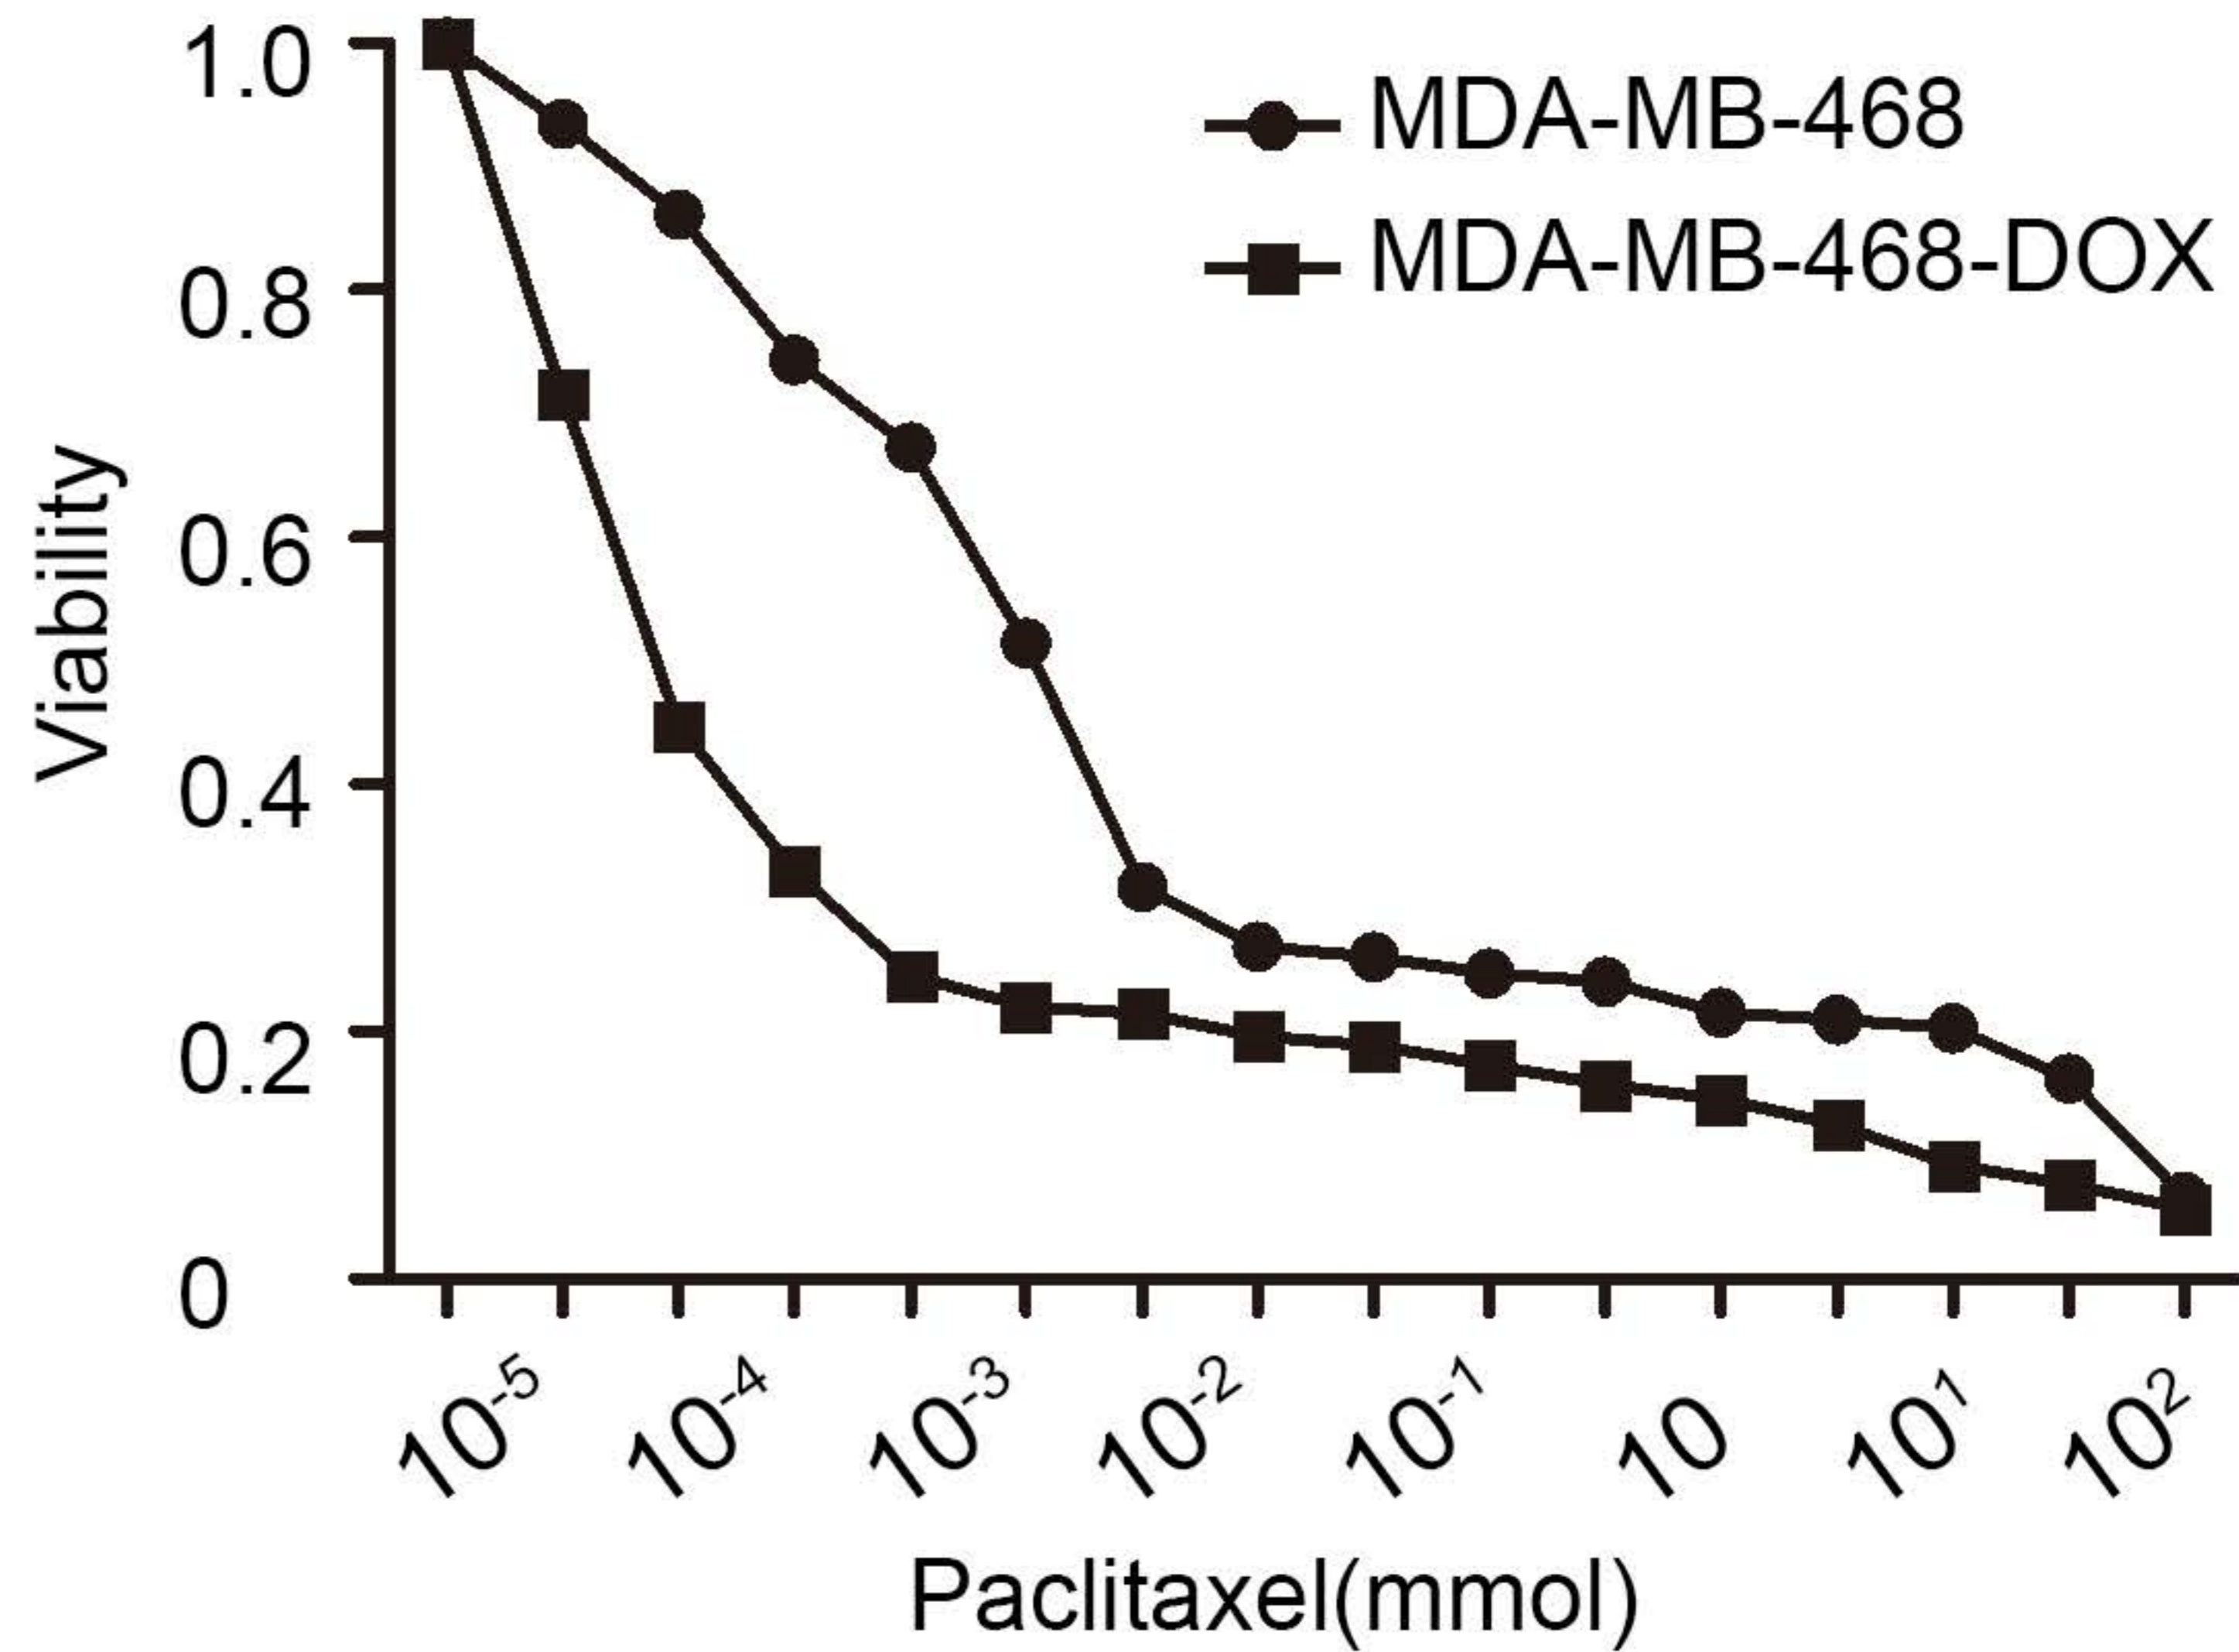

Figure S2

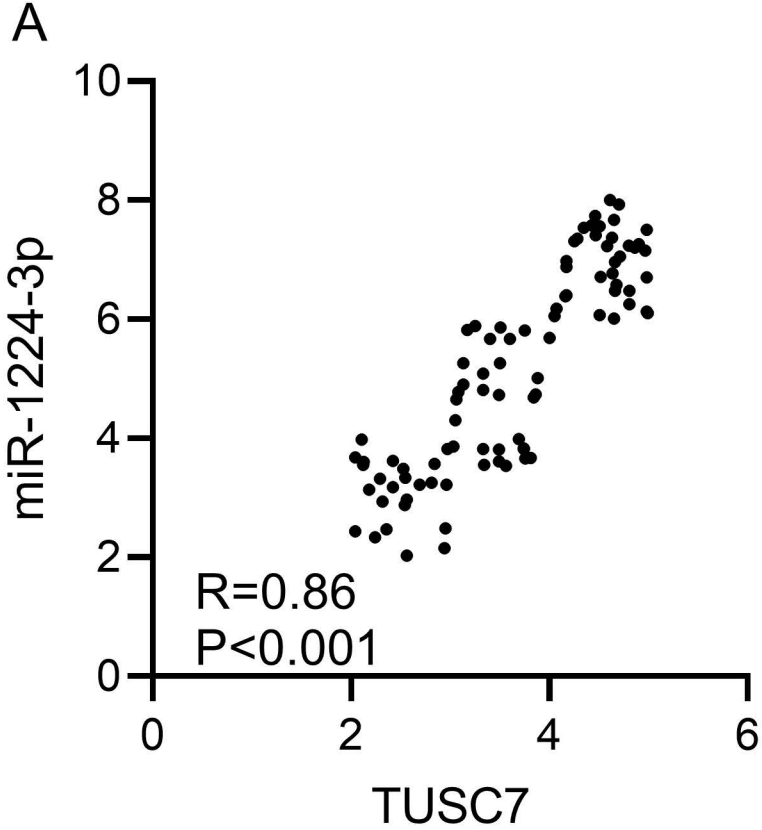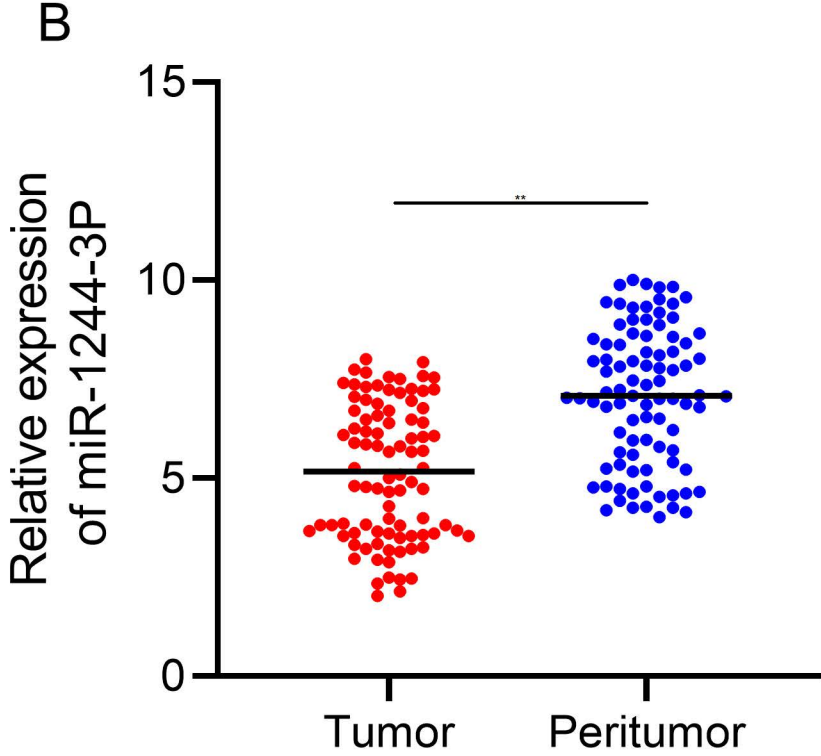

Figure S3

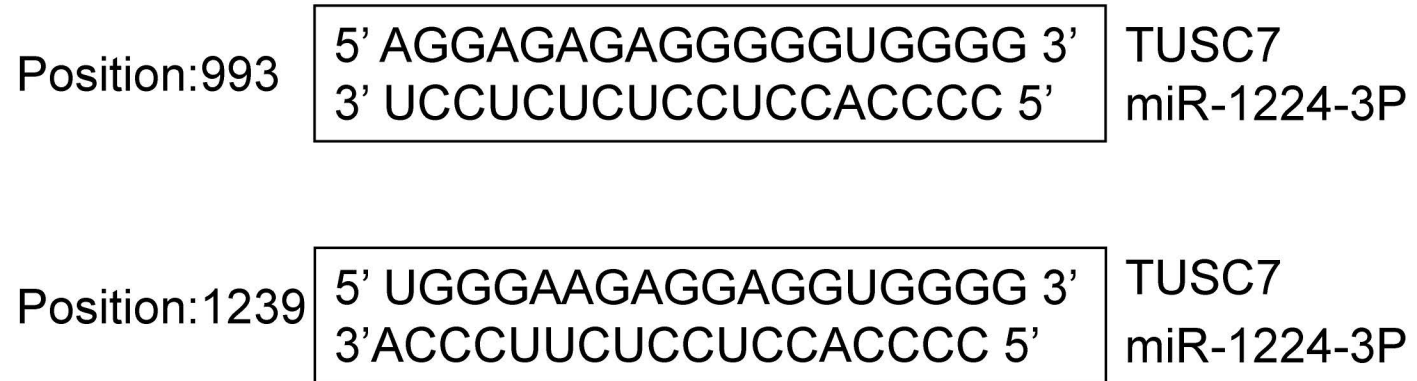

Figure S4

A

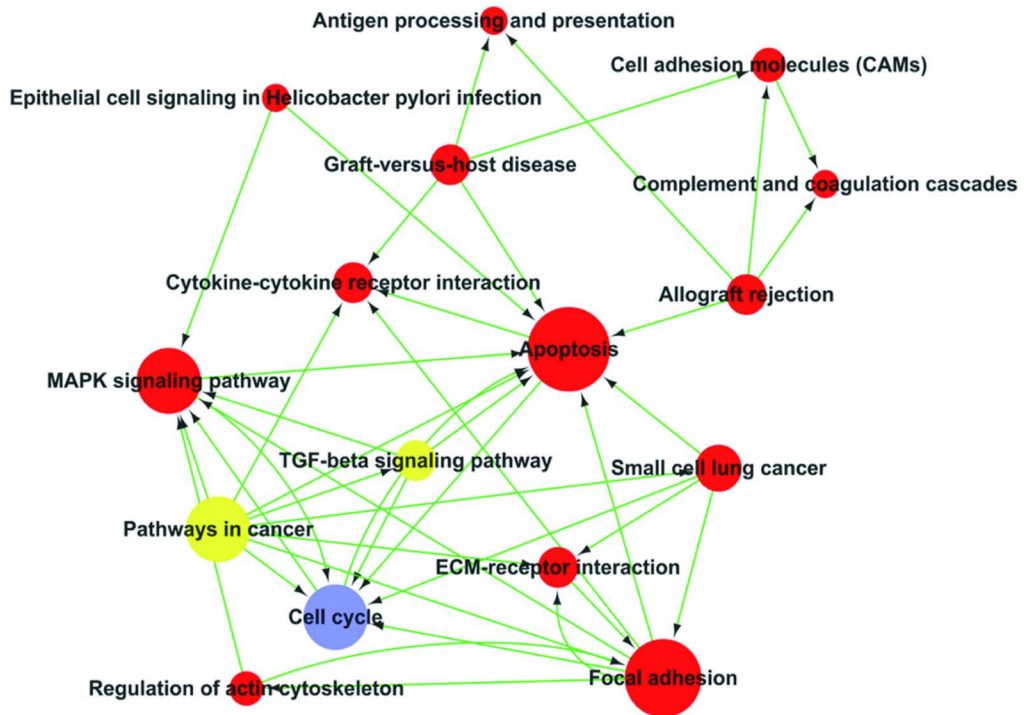

B

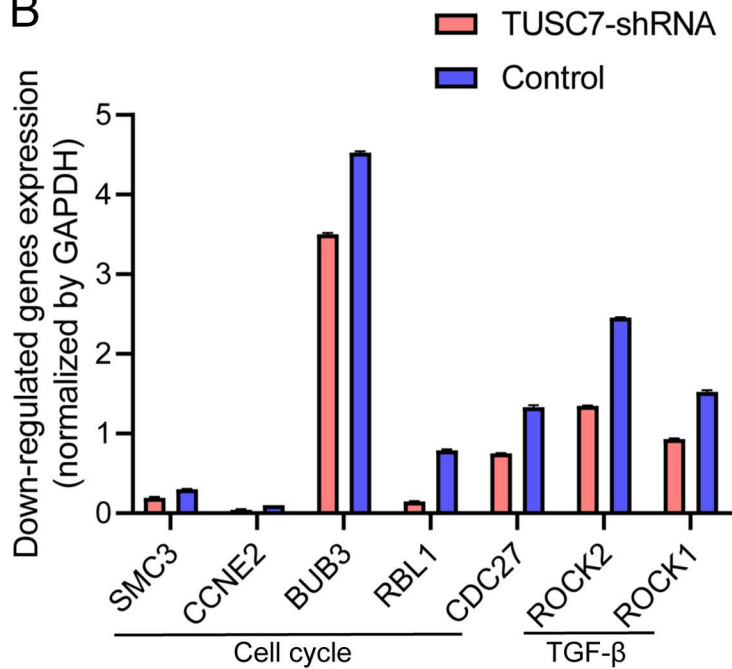

C

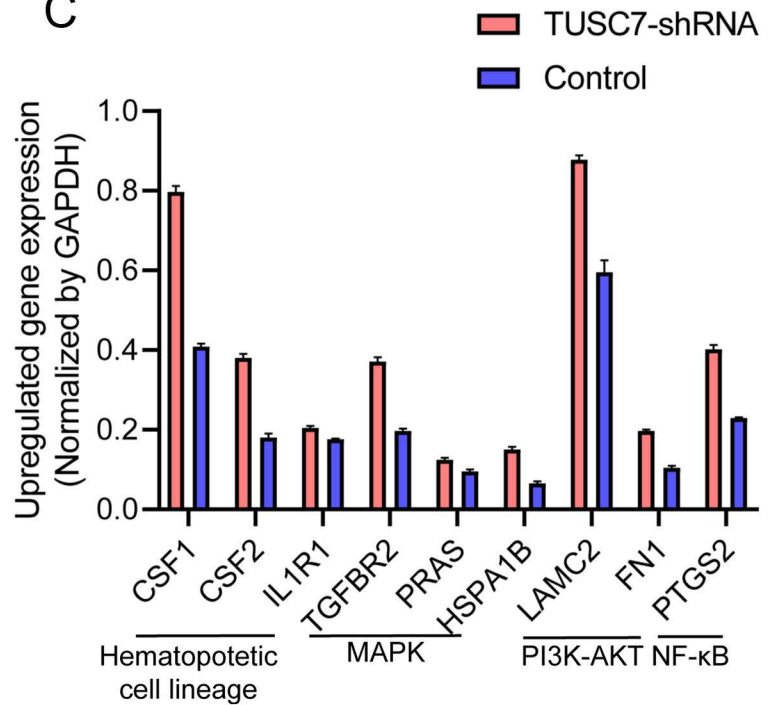

## Supplementary Materials

### Cell culture and real-time polymerase chain reaction

Human breast cancer cell lines HCC1937 (ER-, PR-, HER2-), MDA-MB-468 (ER-, PR-, HER2-), MDA-MB-231 (ER-, PR-, HER2-), MDA-MB-453(ER-, HER2+), T47D (ER+, PR+, HER2-), SK-BR3(ER-, PR-, HER2+), MCF7 (ER+, PR+, HER2-) were obtained from the American Type Culture Collection (ATCC, Rockville, MD, USA). All cells were cultured in DMEM media containing 10% FBS with 1% penicillin/streptomycin (Invitrogen, USA) in a moist 5% CO<sub>2</sub> incubator at 37°C.

Total RNAs were extracted from tumors, their normal tissues or cells using Trizol (Invitrogen). RT (reverse transcription) reactions were performed using a PrimeScript® RT reagent kit (Takara, Dalian, China); reactions were incubated for 30 min at 37°C, 5 s at 85°C, and then maintained at 4°C. For real-time PCR, 1 µL of diluted RT products were mixed with 10 µL of 2×SYBR® Premix Ex Taq™ (Takara), 0.6-µL forward and reverse primers (10 µmol/L), and 8.4-µL nuclease-free water in a final volume of 20 µL according to the manufacturer's instructions. The primers for TUSC7 were 5' - TGTGCCTGTTTGACCTCTGA-3' (forward) and 5' - AGGAAGGATAAAAGACCGACCA-3' (reverse). The primers for GAPDH were 5' - CGGAGTCAACGGATTTGGTCGTAT-3' (forward) and 5' - AGCCTTCTCCATGGTGGTGAAGAC-3' (reverse). All reactions were run on the Eppendorf Mastercycler EP Gradient S (Eppendorf, Germany) using the following conditions: 95°C for 30 s, followed by 40 cycles at 95°C for 5 s, and 60°C for 30 s. Real-time PCR was performed in triplicate, with no-template controls. Amplification of the appropriate product was confirmed by melting curve analysis following amplification. Relative expression of TUSC7 was worked out by the comparative threshold (CT) (2<sup>-ΔΔCT</sup>) method with glyceraldehyde-3-phosphate dehydrogenase (GAPDH) as the endogenous control to normalize the data.

### Vector construction and lentivirus packaging

The wild-type TUSC7 ORF (open reading frame) was isolated from human MDA-MB-231 breast cancer cell cDNA using PCR (forward primer 5'- ATCCAGCCTCTCGAGGGGGTACCAAAGTCCACTCT-3' and reverse primer 5'-

CATGGTGGCGAATTCTTTTTTCGTGAGTACACAATAGTC-3'). The fragment was cloned into the pMT38 lentiviral vector via an Xho I and EcoR I Sunbio company (Shanghai). The pMT38-TUSC7 over-expression plasmid was packaged into mature lentivirus using 293T cells; at 48 hours following the transfection, the lentivirus-containing supernatant was pulled out and went through a 0.45-mm long filter. The titer in these filters was calculated by measuring the HIV (human immunodeficiency virus) p24 gag antigen with an ELISA kit (Perkin-Elmer Life Science, Shanghai). The lentivirus was then transduced into MDA-MB-468 cells with polybrene (8 µg/ml). Controlled expression of TUSC7 was via co-expression of a tetracycline/doxycycline (DOX) responsive repressor (Tet on TUSC7-EGFP-3FLAG-Puro) from Sunbio company (Shanghai). (TUSC7-empty vector (Scramble) or TUSC7-DOX-overexpressing (TUSC Over) MDA-MB-468 cells)

ShRNAs for human TUSC7 were prepared in our laboratory and made in pLKO.1-puro vectors (Sunbio Company, Shanghai)). Three shRNA plasmids were established against diversified TUSC7 targets, encompassing a scrambled sequence, relatively negative. The three shRNA plasmids (Invitrogen, USA) were checked by sequencing. After infection with lentivirus, cells were detected for excessive expressions or decrease of the TUSC7 gene. As for this, one construct, with  $\geq 85\%$  knockdown efficiency, was used to further studies. A scrambled sequence was constructed as a negative control. The shRNA sequences prepared for further research include TUSC7 shRNA, 5'-CCGGGGTAGAGATAAGTCTGACATTCAAGAGATGTCAGACTTATCTCTACCTTTTTTG-3' and Scramble shRNA, 5'-CCGGCCTAAGGTTAAGTCGCCCTCGCTCGAGCGAGGGCGACTTAACCTTAGGTTTTTG-3'. (TUSC7-scrambled shRNA control MDA-MB-231 cells: Scramble shRNA), TUSC7-shRNA MDA-MB-231 cells: TUSC shRNA).

The wild-type and mutant p53 vectors were obtained from Sunbio company, Shanghai. MDA-MB-468 breast cancer cells were transfected with wildtype/mutant p53 vector with various concentrations of doxorubicin (doxo), a known DNA damaging agent. Therefore, we then chose doxo at 1mg/ml for 24h to further confirm the specific effect of p53 on TUSC7 expression.



### **CCK8 (Cell Counting Kit-8) assays, migration, invasion, and cell cycle analysis**

Cells ( $2 \times 10^4$ ) were cultivated in microtiter containers with an amount of 110  $\mu$ l complete medium per well in 37°C, 5% CO<sub>2</sub> for 5 days. After the period of incubating cells, 10  $\mu$ l of the CCK8 labeling reagent (0.5 mg/ml) (The Cell Counting Kit-8 assay; Dojindo Laboratories, Kumamoto, Japan) was added to each microtiter. Then all the cells were tested by an enzyme-labeled meter. The process of absorbing was measured at 450 nm. All experiments were performed three times in triplicate.

*In vitro* cell migration and invasion assays were conducted as mentioned before [18]. Images of three random fields (10 $\times$ ) were noticed from each membrane, and the migratory or invasive cells were counted. Triplicate assays were performed in each experimental time.

For transwell migration assays, cells were plated at  $1 \times 10^5$  cells/well in the chamber on the top of a membrane (8  $\mu$ m, BD Biosciences, Shanghai) with fibronectin (100  $\mu$ g/ml) and 2.5% BSA (albumin from bovine serum). Cells were stored for the specified lengths of time under standard culture conditions. Tumor cells remaining on the upper side of the membrane were put away and cells that had migrated to the underside were stuck and stained in 0.1% crystal violet for half an hour, rinsed in PBS (phosphate buffer saline), and then subjected to microscopic inspection. Five fields per insert were shot. Then, the cell numbers for each field were count and the average numbers were extracted for further analysis.

The *in vitro* invasion studies were performed using a BD Bio-Coat Matrigel invasion assay system (Becton Dickinson Labware, Franklin Lakes, NJ, USA). Cells were seeded at  $5 \times 10^4$  cells/well on 8- $\mu$ m pore-size transwells (Corning, NY, USA). The lower chamber was filled with DMEM containing 10% FBS (fetal bovine serum). After 24 hours, the number of cells in the bottom compartment of the filter membranes was confirmed. Each experiment was performed in triplicate.

Treated cells were put in ethyl alcohol (70%) and dyed in propidium iodide (10 mg/ml, MP Biomedicals, USA), RNase (10 kU/ml, Sigma-Aldrich, USA), and NP40 (0.01%, Sigma-Aldrich) overnight at 48°C in darkness. Then the cells were analyzed by flow cytometry (FAC Station, BD Biosciences) and FlowJo (TreeStar Inc., Ashland, OR).

### **MiRNA microarray and mRNA microarray**

Total RNA was extracted using a mirVana™ miRNA Isolation Kit (Ambion, Austin, TX) according to the manufacturer's instructions. The BioAnalyzer 2100 (Agilent Technologies, Santa Clara, CA) was used to check the quality of the purified RNA. The human miRNA V18.0 microarray chips (Agilent Technology, Austin, TX), containing probes for the complete Sanger miRBase 10.0, were used to screen the samples of different groups. Briefly, RNA samples were labeled and hybridized with miRNA complementary probes printed on a glass slide. After hybridizing them, the slides were scanned by an Agilent Microarray Scanner (Agilent Technologies, Santa Clara, CA) using the default settings and analyzed using Gene Spring Software 11.0 (Agilent Technologies). For mRNA microarray, HTA2.0 mRNA microarrays Chips (Affymetrix, Santa Clara, CA) were used according to the manufacturer's instructions to identify the differences between the samples. The slides were scanned by the GeneChip Scanner 3000 and Command Console Software 3.1 (Affymetrix). The miRNA microarray and mRNA microarray were performed by the Shanghai Qiming Corporation (Shanghai, China). Gene ontology (GO) analysis and the KEGG pathway were performed for the intersected genes to identify the relevant pathway.

### **Luciferase reporter assays**

The 3'-UTR of TUSC7 (NR\_015391.1) was amplified from human genomic DNA using appropriate primers and subcloned into the region directly downstream of the Renilla gene stop codon in the psiCHECK2 vector (Promega, Madison, WI) to generate psiCHECK2-TUSC7-3'-UTR constructs. With appropriate primers, PCR amplification of the 3'UTR sequence of TUSC7 generated a series of mutant psiCHECK2-TUSC7-3'-UTR reporter vectors. miR-1224-3P、miR-7113-5p、miR-920、miR-637、miR-608、hsa-miR-6770-5p、hsa-miR-1207-5p、hsa-miR-4451 mimic duplexes were synthesized by Gene Pharma (Shanghai, China). HEK 293T cells were transfected with a mixture of reporter constructs and miR duplexes using Lipofectamine 2000 (Invitrogen, Carlsbad, CA). After 48 hours of incubation, firefly, and Renillaluciferase activities were measured using the dual-luciferase reporter assay system (Promega, Madison, WI) from the cell lysates.



**A fragment of TUSC7 3'UTR including the binding site of Mir-1224-3P.**

>TUSC7 NR\_015391.1

GGGGTACCAAAGTCCACTCTGAGCTTTTCCTCTGGGAACAGATCCCAGATT  
ATTCCAGACTTAAGACATGGAGATATATCTTGCTAGAGGTTAGGAAGATGATA  
AGATCAGTTTCTATAGGTAGAGGATAATGTGTCCTAAAATGTAGGTAGAGAT  
AAGTCTGACAGTGGTTTAGACAAAAAGGGCCTCTGCTAATGGTGGAGAGA  
TCAAGGAAGAAAAGAGCAACGTTAAAGTGAGGCTGTACCCACAGATCATG  
CTCAAGCAAATTCGAACCGTGAGCGCATTCTCTTAAACAATGAACACTTA  
GAATAAAAATTAATAATTTCCACAAATTTCTAATTTTAAAATAGTTTCCCAA  
GATTCAGTGGTATTGTATATATGCCATATAATTTTTTGGATTACTATTCCCA  
CAAGTGTAAGATGAAAGAGGACCTGCCCTCCATTCTATCTACTCCTCTCTG  
CAAAGGCCATTTTGAAGA TCTCAGTTTTACTGAAAGGGGTCTGCCACACAT  
AAC TTCCCTGGTGTACCAGCAACAAGTGTTCAGTGGACCATGGCAACACA  
AAGAATGACGGAGGAGAGAAAATGCCATGCAGAAGTGATAGTCAAGATGA  
AGATGTGGGAGAGGAGCAGCCCCAGTATATATTCAGTGTGTCCTCTGAAG  
TAACAACCATCCCATCTGGCTGAGAAGTGATGGACACGGCTCCTTAACCAC  
ACTGTACCCTCTGTTCTTGGCACCTC TCTACCA GAAAGATATCAACAAATTG  
GATGGAATTCAGAGAACAGTAAGAAAAATGATTAAAGAGATGGAGGCAGT  
GACTTATGAGGAAAGATGAAAAGGACTAAATCTATGTAGCTTGGCAAAGCA  
ACAACTGAGGTGGCGTATGAAAAGTGTCTACAAGCATTGAAGAATATAAA  
CACCAAGGGAAGAGAGGGAACTTTTTAGAAATGGTCTGGGGAATAAGCAGA  
GTAAGAGGACAGAATTGAAGAAAGGAGAGAGATATGCTAAGTTGGGGGTG  
GGG GCGTTTTCTCATCAATTGTAAATTTGATAAATAACAAAATTAAGTCTG  
GAGAGAAAGAGTTGCATCTCATGCTTTTAGGTTACAATCAGTGTGACCTG  
CACTGAGAAAATGTGACTTCCTATTAT CCTTCTCA AAGTTATTGCTGCAGAG  
GAAAGAAGCATAACATCTTTTACCCACCAGGAAACCCCCAAAGCATCTATTA  
CCATAATAGCCATGGGAAACAGAAGGCACCTCAAATAAAGGTGGGGAAAA  
GAATGAAAGAAATGGCTTTGGCCTGTGCCTGTTTGACCTCTGAGAGATACT  
TTTTGCAAGAAATTGTTAAGTTTTGGCCAAAAAGTGGTCGGTCTTTTATCC  
TTCCTTGTGGAGGCCAAACTGCAAACCAGGATGAAGAAACCATCAGTGGC  
AGTTTGGGGAGGTGGAGGAGGGACTATCTAGACTCAGTGAATCACCAAGG  
AAACATGAGGCCTATTTCTCTGTGAAGCTGAACTTCAAAAAACAATCTAAG  
AGATACAAAGGGAAAAGTGTGACTGCTCTGACAGCAAAAACAAGCAAATA  
TCTCCAGAGGGGATTAATCCTTCTGCTTCAAAGTAACTAAAACAAAGAAAG  
CTGAGCCAGCTTCACTGGAAACAACACCTGTCCATCAGACAAGGATGAGC  
TAATCAAAAGAAAACACTGCCTATGTGCACGACTCAGCAGCCTGGACAGC  
TAATACCAAGGAACACGTTTTCACTATAAAGATTCAGCTTTCAAATC CAGT  
TCCCTCTTGTAGAGCCACAGGGTTAAAAGGGACCTTAGAGATCATCTACAT  
ACAGGCCAAACCCTCAATGAATGCCAGTGTTCGCCTTATGTTCTTCTTGCCG  
GACTCTTTTCTGGCCTCT GTCTGTCA GGATGTTTCTGTTTTGCAAAACAG  
CTTAATCCTTGAGTATATTTAATTGTTAGAAAACAGTTCCTCAAATTTGACC  
CCAAATTTAAGTCTAATTTATGAAGAAAGTTTTGCCTTTGGAGACAGGTTTA  
ATTTACTTCCATGTGGAAAACCTTCAAATAAAATGATGACTATTGTGTACT  
CACGAAAAA

### Mir-1224-3P: cccaccuccucucuccucag

dataset: 1  
Target: TUSC7  
length: 2105  
MiRNA: Mir-1224-3P  
length: 21  
mfe: -37.7 kcal/mol  
p-value: 1.000000e+00

Position: 993  
target 5' A GAUAUGCUAAGUU G 3'  
AGGAGAGA GGGGUGGGG  
UCCUCUCU CCUCCACCC  
miRNA 3' GAC 5'

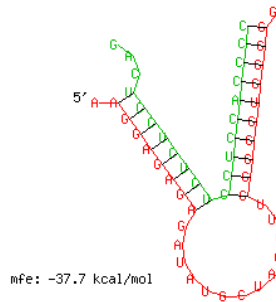

dataset: 1  
Target: TUSC7  
length: 2105  
MiRNA: Mir-1224-3P  
length: 21  
mfe: -26.4 kcal/mol  
p-value: 1.000000e+00

Position: 1239  
target 5' A AAC A CACCUCAAAUA A 3'  
UG GGA AG AGG AGGUGGG  
AC CCU UC UCC UCCACCC  
miRNA 3' G U C 5'

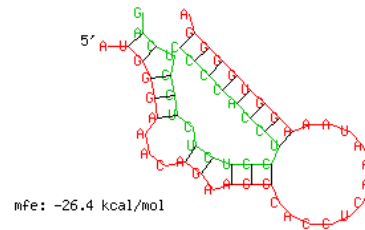

### Mir-7113-5p: uccaggagacagugugag

dataset: 1  
Target: TUSC7  
length: 2105  
MiRNA: Mir-7113-5p  
length: 21  
mfe: -27.9 kcal/mol  
p-value: 1.000000e+00

Position: 508  
target 5' C AAC U 3'  
CACACAU UUCCUGG  
GUGUGUG GAGGACC  
miRNA 3' GA ACA U 5'

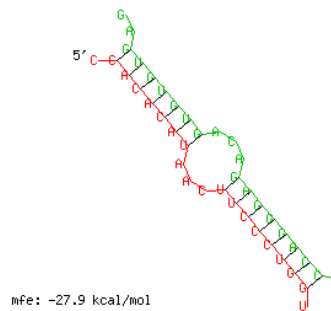

### Mir-920: ggggagcuguggaagcagua

dataset: 1  
**Target:** *TUSC7*  
length: 2105  
**MiRNA:** *mir-920*  
length: 20

mfe: -27.7 kcal/mol  
p-value: 1.000000e+00

*Position: 1768*  
target 5' A AAAUC C 3'  
GCUUUCA CAGUCCCU  
CGAAGGU GUCGAGGGG  
miRNA 3' AUGA 5'

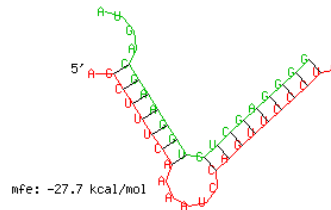

plot as [png](#), [jpeg](#) or [ps](#) (in a new window)

dataset: 1  
**Target:** *TUSC7*  
length: 2105  
**MiRNA:** *mir-920*  
length: 20

mfe: -26.9 kcal/mol  
p-value: 1.000000e+00

*Position: 684*  
target 5' G AGAAGUGAUGGA A 3'  
GCUG CACGGCUCCUU  
UGAC GUGUCGAGGGG  
miRNA 3' A GAAG 5'

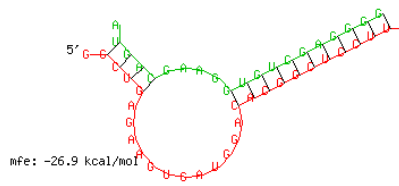

plot as [png](#), [jpeg](#) or [ps](#) (in a new window)

dataset: 1  
**Target:** *TUSC7*  
length: 2105  
**MiRNA:** *mir-920*  
length: 20

mfe: -25.5 kcal/mol  
p-value: 1.000000e+00

*Position: 1961*  
target 5' A AGAAA A 3'  
AUUGUU ACAGUCCUC  
UGACGA UGUCGAGGGG  
miRNA 3' A AGG 5'

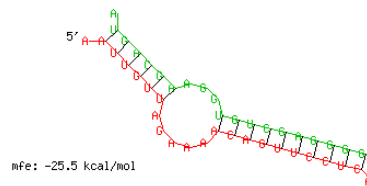

plot as [png](#), [jpeg](#) or [ps](#) (in a new window)

### Mir-637: acugggggcuuucgggcucugcgu

dataset: 1  
**Target:** *TUSC7*  
length: 2105  
**MiRNA:** *mir-637*  
length: 24

mfe: -33.9 kcal/mol  
p-value: 1.000000e+00

*Position: 617*  
target 5' G G A GC A 3'  
AUGUGG AG GGA AGCCCCCAGU  
UGCGUC UC CUU UCGGGGGUCA  
miRNA 3' GGG 5'

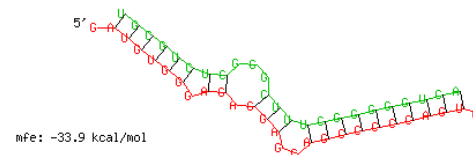

plot as [png](#), [jpeg](#) or [ps](#) (in a new window)

### Mir-608: agggguggguugggacagcuccgu

dataset: 1  
**Target:** TUSC7  
length: 2105  
**MiRNA:** mir-608  
length: 25  
  
mfe: -29.7 kcal/mol  
p-value: 1.000000e+00

**Position: 650**  
target 5' C G CUGAAGU A A 3'  
AGU UGUCCU AAC ACCAUCCC  
UCG ACAGGG UUG UGGUGGGG  
miRNA 3' UGCC A 5'

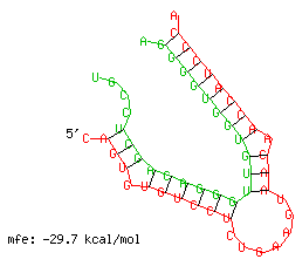

plot as [png](#), [jpeg](#) or [ps](#) (in a new window)

dataset: 1  
**Target:** TUSC7  
length: 2105  
**MiRNA:** mir-608  
length: 25  
  
mfe: -28.4 kcal/mol  
p-value: 1.000000e+00

**Position: 1**  
target 5' A AGU G 3'  
GGGGU CCAA CCACUCU  
CCUCG GGUU GGUGGGG  
miRNA 3' UG ACAG GU A 5'

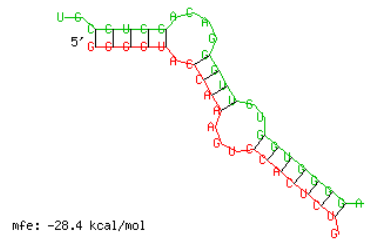

plot as [png](#), [jpeg](#) or [ps](#) (in a new window)

**hsa-miR-6770-5p: ugagaaggcacagcuugcagcuga**

dataset: 1  
**Target:** TUSC7  
length: 2105  
**MiRNA:** hsa-miR-6770-5p  
length: 24  
  
mfe: -24.9 kcal/mol  
p-value: 1.000000e+00

**Position: 1119**  
target 5' G C CUG AAAA ACUUCCUAUUAU A 3'  
AC UGCA AG UGUG CCUUCUCA  
UG ACGU UC ACAC GGAAGAGU  
miRNA 3' AG C G 5'

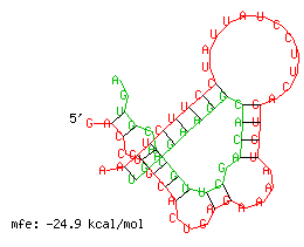

plot as [png](#), [jpeg](#) or [ps](#) (in a new window)

dataset: 1  
**Target:** TUSC7  
length: 2105  
**MiRNA:** hsa-miR-6770-5p  
length: 24  
  
mfe: -24.3 kcal/mol  
p-value: 1.000000e+00

**Position: 1016**  
target 5' G G G U 3'  
G GUG GGGC GUUUUCUCA  
U CAC UUCG CGGAAGAGU  
miRNA 3' AG G G ACA 5'

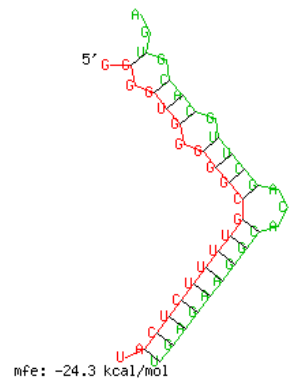

plot as [png](#), [jpeg](#) or [ps](#) (in a new window)

**hsa-miR-1207-5p: uggcagggaggcugggagggg**

dataset: 1  
**Target:** *TUSC7*  
length: 2105  
**MiRNA:** *hsa-miR-1207-5p*  
length: 21

mfe: -32.7 kcal/mol  
p-value: 1.000000e+00

**Position:** 1890

|        |                 |  |        |  |      |
|--------|-----------------|--|--------|--|------|
| target | 5' C            |  | GUU    |  | G 3' |
|        | UCUUUCUGGCCUCU  |  | CUGUCA |  |      |
|        | GGGAGGGUGCGGAGG |  | GACGGU |  |      |
| miRNA  | 3'              |  |        |  | 5'   |

mfe: -32.7 kcal/mol

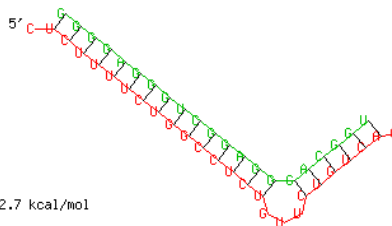

plot as [png](#), [jpeg](#) or [ps](#) (in a new window)

dataset: 1  
**Target:** *TUSC7*  
length: 2105  
**MiRNA:** *hsa-miR-1207-5p*  
length: 21

mfe: -31.7 kcal/mol  
p-value: 1.000000e+00

**Position:** 437

|        |        |     |               |  |       |
|--------|--------|-----|---------------|--|-------|
| target | 5' G   |     | AUUCUAUCUACUC |  | A 3'  |
|        | CCCUCC |     | CCUCUCUCG     |  |       |
|        | GGGAGG |     | GGAGGGACG     |  |       |
| miRNA  | 3' G   | GUC |               |  | GU 5' |

mfe: -31.7 kcal/mol

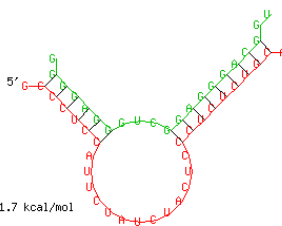

plot as [png](#), [jpeg](#) or [ps](#) (in a new window)

dataset: 1  
**Target:** *TUSC7*  
length: 2105  
**MiRNA:** *hsa-miR-1207-5p*  
length: 21

mfe: -31.5 kcal/mol  
p-value: 1.000000e+00

**Position:** 1845

|        |       |          |       |                |            |      |
|--------|-------|----------|-------|----------------|------------|------|
| target | 5' A  | AAUGAAUG |       | GUUCGCCUUAUGUU |            | G 3' |
|        | CCCUC |          | CCAGU |                | CUUCUUGCCG |      |
|        | GGGAG |          | GGUCG |                | GAGGGACGGU |      |
| miRNA  | 3' G  |          |       |                |            | 5'   |

mfe: -31.5 kcal/mol

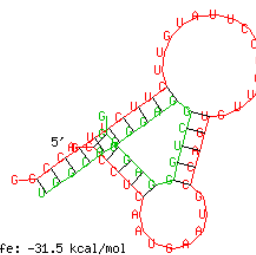

plot as [png](#), [jpeg](#) or [ps](#) (in a new window)

### hsa-miR-4451: ugguagagcugaggaca

dataset: 1  
**Target:** *TUSC7*  
length: 2105  
**MiRNA:** *hsa-miR-4451*  
length: 17

mfe: -26.0 kcal/mol  
p-value: 1.000000e+00

**Position:** 728

|        |            |  |         |  |      |
|--------|------------|--|---------|--|------|
| target | 5' C       |  | ACCUC   |  | G 3' |
|        | UGUUCUUGGC |  | UCUACCA |  |      |
|        | ACAGGAGUCG |  | AGAUGGU |  |      |
| miRNA  | 3'         |  |         |  | 5'   |

mfe: -26.0 kcal/mol

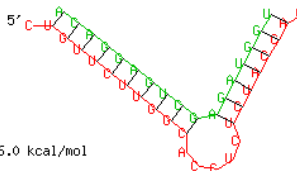



dataset: 1  
**Target:** *TUSC7*  
length: 2105  
**MiRNA:** *hsa-miR-4451*  
length: 17

mfe: -22.8 kcal/mol  
p-value: 1.000000e+00

*Position: 482*  
target 5' A G 3'  
UCUCAGUUUUACU  
GGAGUCGAGAUGG  
miRNA 3' ACA U 5'

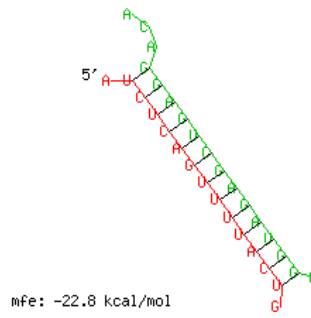

dataset: 1  
**Target:** *TUSC7*  
length: 2105  
**MiRNA:** *hsa-miR-4451*  
length: 17

mfe: -21.6 kcal/mol  
p-value: 1.000000e+00

*Position: 1897*  
target 5' C G U G 3'  
UG CCUC GUUCUGUCA  
AC GGAG CGAGAUGGU  
miRNA 3' A U 5'

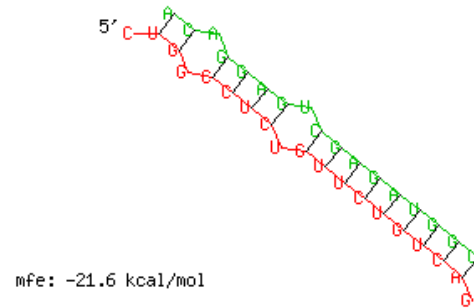

**Table S1.** Microarray gene expression profiling analysis identified 29 TUSC7-associated miRNAs

| <b>miRNA</b>    | <b>Expression</b> | <b>miRNA</b>    | <b>Expression</b> |
|-----------------|-------------------|-----------------|-------------------|
| hsa-miR-30b-3p  | down              | hsa-miR-744-3p  | up                |
| hsa-miR-3613-5p | down              | hsa-miR-6877-3p | up                |
| hsa-miR-4701-3p | down              | hsa-miR-5739    | up                |
| hsa-miR-501-3p  | down              | hsa-miR-7845-5p | up                |
| hsa-miR-1303    | down              | hsa-miR-30e-5p  | up                |
| hsa-miR-628-3p  | down              | hsa-miR-3184-3p | up                |
| hsa-miR-489-3p  | down              | hsa-miR-1224-5p | up                |
| hsa-miR-891a-5p | down              | hsa-let-7f-1-3p | up                |
| hsa-miR-767-5p  | down              | hsa-miR-3176    | up                |
| hsa-miR-1587    | down              | hsa-miR-494-3p  | up                |
| hsa-miR-5585-3p | down              | hsa-miR-6728-5p | up                |
| hsa-miR-6808-5p | down              | hsa-miR-5684    | up                |
| hsa-miR-660-5p  | down              | hsa-miR-3156-5p | up                |
|                 |                   | hsa-miR-19a-3p  | up                |
|                 |                   | hsa-miR-183-3p  | up                |
|                 |                   | hsa-miR-6508-5p | up                |

**Table S2. Possible binding sites of the 3'-UTR sequence of TUSC7 and miRNAs.**

| <b>miRNA</b>    | <b>Base sequence</b>              |
|-----------------|-----------------------------------|
| Mir-1224-3P     | CCCCACCUCCUCUCUCCUCAG             |
| Mir-7113-5p     | UCCAGGGAGACAGUGUGUGAG             |
| Mir-920         | GGGGAGCUGUGGAAGCAGUA              |
| Mir-637         | ACUGGGGGCUUUCGGGCUCUGCGU          |
| Mir-608         | AGGGGUGGUGUUGGGACAGCUCCGAGGGGUGGU |
| hsa-miR-6770-5p | UGAGAAGGCACAGCUUGCACGUGA          |
| hsa-miR-1207-5p | UGGCAGGGAGGCUGGGAGGGG             |
| hsa-miR-4451    | UGGUAGAGCUGAGGACA                 |
